# Supplementary material for: Stochastic and Differential Activation of σB and PrfA in Listeria monocytogenes at the Single Cell Level under Different Environmental Stress Conditions
Source: PubMed Central journal article supplement (PMC5349113; doi:10.3389/fmicb.2017.00348), 2017-03-14
Supplement: Image1.pdf [file Image1.pdf]

1 **Supplementary file**

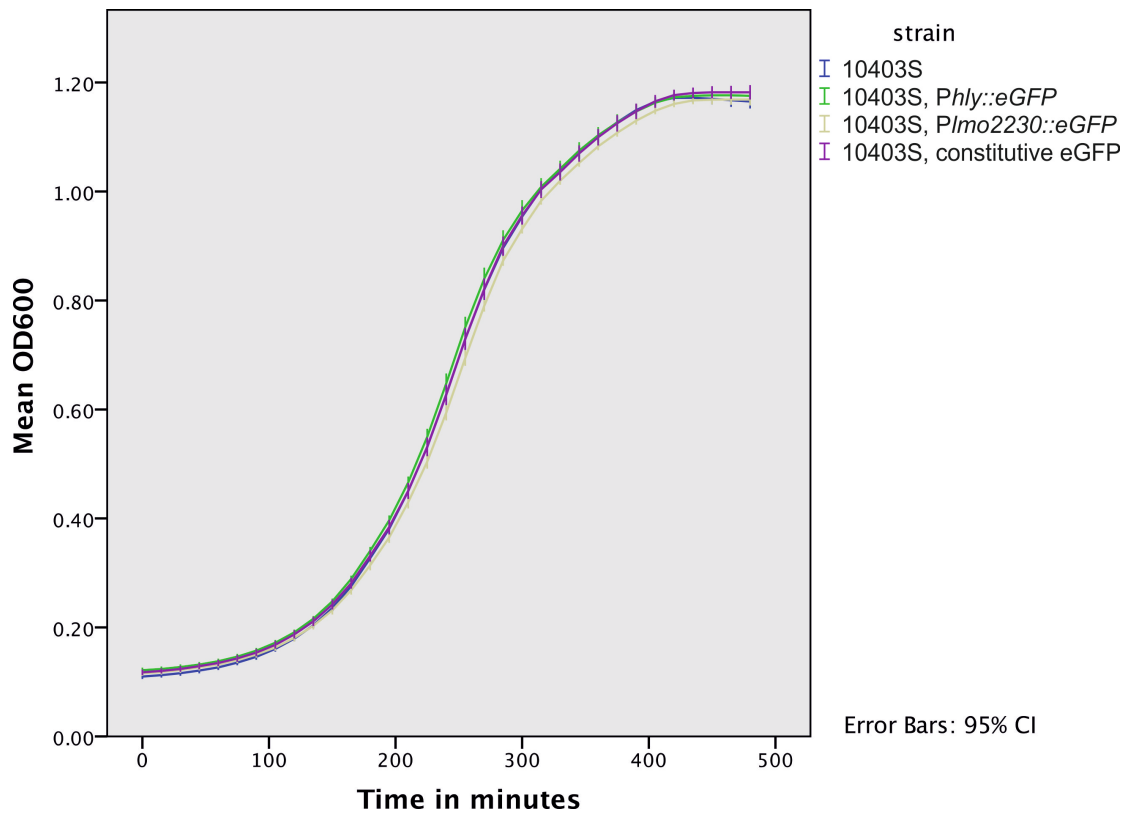

2

3 **Supplementary Figure 1.** Growth curves of *L. monocytogenes* 10403S, the PrfA reporter  
4 10403S, *Phly::eGFP*, the  $\sigma^B$  reporter 10403S, *Plmo2230::eGFP* and the 10403S, constitutive  
5 eGFP expressing strain over 500 minutes. Log phase cultures ( $OD_{600} = 0.4$ ) were diluted 1:40  
6 into fresh BHI and the  $OD_{600}$  was measured every 15 minutes over eight hours. The data  
7 represent three biological replicates with two technical replicates each.

8 A Buchanan curve was fit to the data using the package “nlsMbio” in R. A Kruskal-Wallis  
9 rank sum test was used to compare the maximal growth rates,  $p = 0.1681$ .

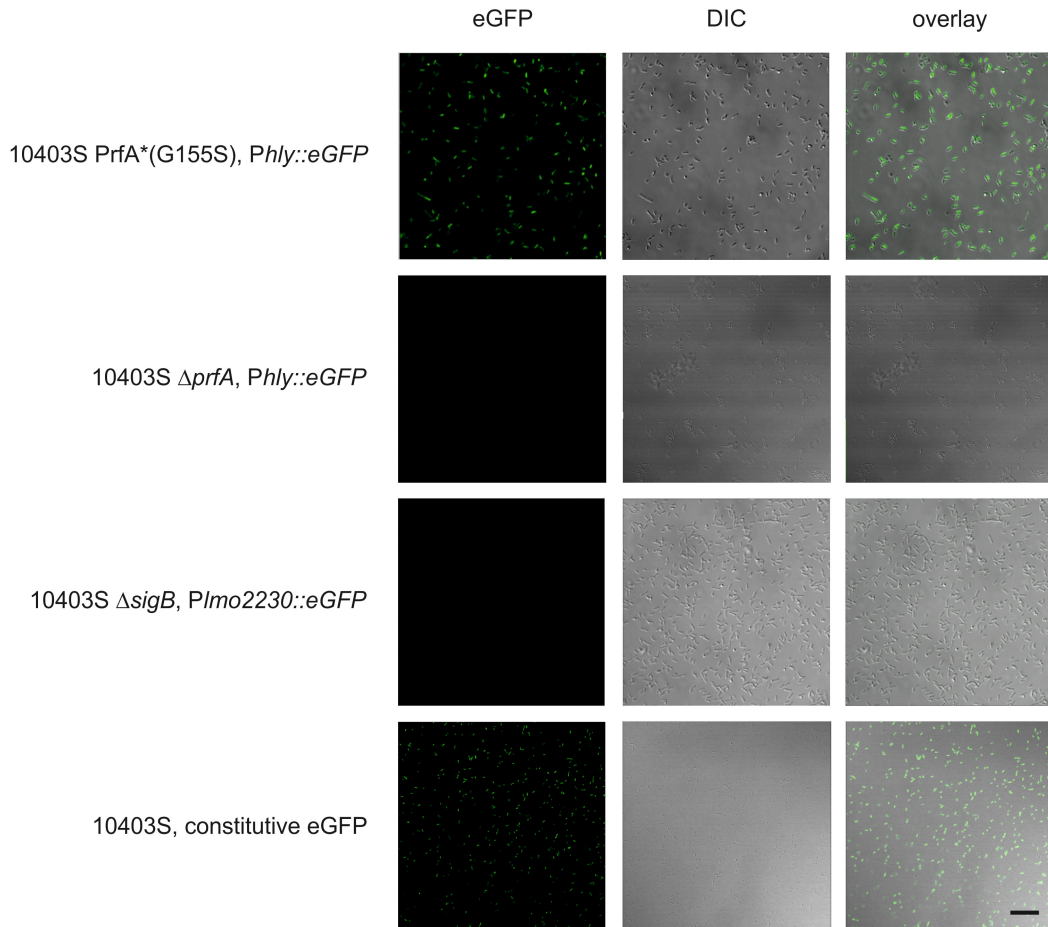

10

11 **Supplementary Figure 2:** representative confocal images of the control strains. The 10403S  
 12 PrfA\*(G155S), *Phly-eGFP* reporter and the 10403S, constitutive eGFP strains were grown to  
 13 log phase ( $OD_{600} = 0.4$ ) and imaged. The 10403S  $\Delta sigB$ , *Plmo2230::eGFP* reporter was  
 14 imaged after growing to stationary phase overnight. The log phase 10403S  $\Delta prfA$ ,  
 15 *Phly::eGFP* reporter was exposed to heat stress in PBS as described in the materials and  
 16 methods section and then imaged. Left column: eGFP fluorescence. Middle column:  
 17 differential interference contrast (DIC). Right column: overlay of the eGFP fluorescence with  
 18 the DIC image. Scale bar = 10  $\mu m$ .

19

20

21

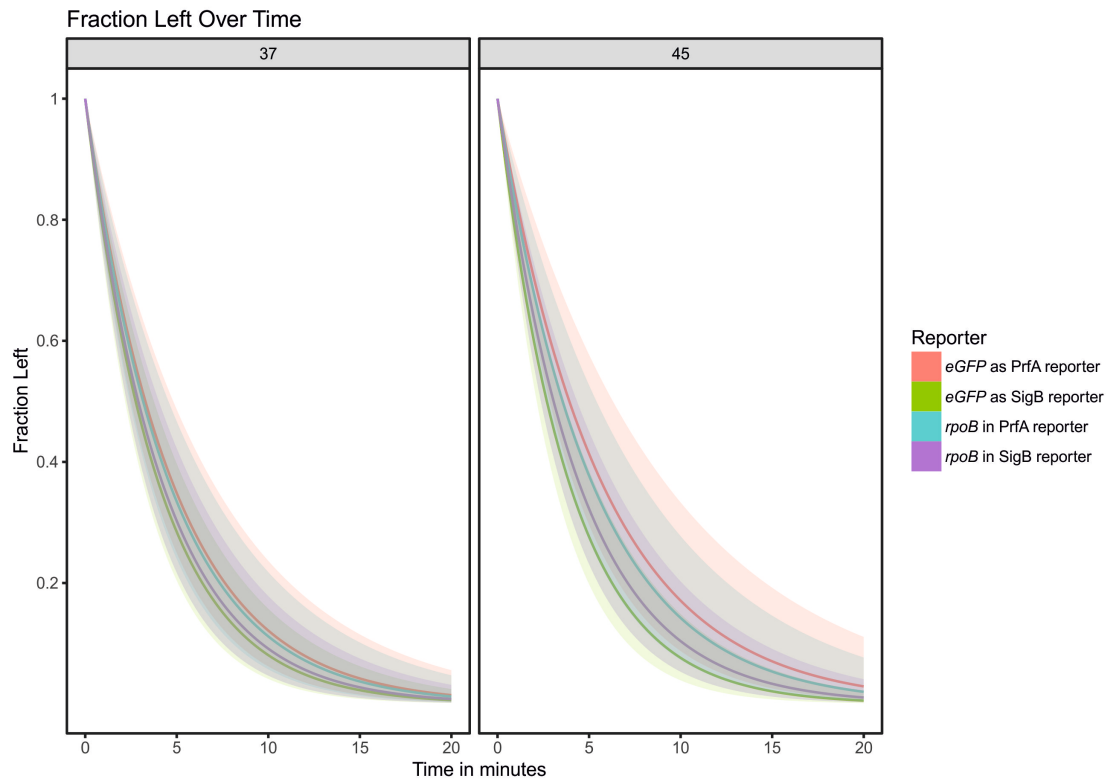

22

23 **Supplementary Figure 3.** mRNA stability of the reporter constructs. Transcription was  
 24 stopped at t=0 through the addition of rifampicin (50  $\mu\text{g/ml}$ ) and the mRNA levels were  
 25 determined by an RT-qPCR time series. There was no significant effect ( $p=0.25$ ) of reporter  
 26 (PrfA reporter or the  $\sigma^B$  reporter construct mRNA) on mRNA decay (as measured by the  
 27 slope of the decay curve for the two reporters) using the data for both temperatures. The  
 28 shading around the curves represents the 95% confidence interval.

29

30

Supplementary Table 1 | Primers used in this study

| Name                         | Description                          | Sequence                                                | Primer Pair Amplification Efficiency (T <sub>m</sub> ) <sup>1</sup> |
|------------------------------|--------------------------------------|---------------------------------------------------------|---------------------------------------------------------------------|
| CG20                         | <i>Plmo2230-eGFP</i> Utratna reverse | ATCGGTCGACTTATTTGTATAATTCATCCATTCCTAAAG                 |                                                                     |
| CG22                         | <i>Plmo2230-eGFP</i> Utratna forward | ATGCGGATCCTTTCCGATATGTTTGTTCCTCAGA                      |                                                                     |
| CG17sBe                      | pPL2 MCS forward                     | GAAAGGGCCTCGTGATACGCCTA                                 |                                                                     |
| CG18sBe                      | pPL2 MCS reverse                     | GGTCGTAAATAGCGACGTCAATACGACTC                           |                                                                     |
| CG11sBe                      | <i>Phly</i> forward                  | ATGCGGATCCAAGTTACTTTTATGTGGAGGCATT                      |                                                                     |
| CG12sBe                      | <i>Phly</i> reverse                  | GGGTTTCACTCTCCTTCTACATT                                 |                                                                     |
| CG19                         | <i>eGFP</i> forward                  | AAATGTAGAAGGAGAGTGAAACCCATGGTTAGT<br>AAAGGAGAGGAATTATTC |                                                                     |
| CG20                         | <i>eGFP</i> reverse                  | ATCGGTCGACTTATTTGTATAATTCATCCATTCCTAAAG                 |                                                                     |
| VGO-15- <i>sigB</i> -RT-F    | qPCR                                 | GCGCCGAATCAAAGAGTTAG                                    | 1.91 (55°C)                                                         |
| VGO-16- <i>sigB</i> -RT-R    | qPCR                                 | CCATCCGAATCAGCTTCAAT                                    |                                                                     |
| VGO-17- <i>lmo2230</i> -RT-F | qPCR                                 | TGGGCGAAAAGACTTTCACT                                    | 1.86 (55°C)                                                         |
| VGO-18- <i>lmo2230</i> -RT-R | qPCR                                 | GCTGGAAATTTGGTGCAGT                                     |                                                                     |
| VGO-23- <i>rpoB</i> -RT-F    | qPCR                                 | TCGTCGTCTTCGTTCTGTTG                                    | 1.88 (55°C)                                                         |
| VGO-24- <i>rpoB</i> -RT-R    | qPCR                                 | GTTCGCCAAGTGGATTTGTT                                    |                                                                     |
| CG35 <i>eGFP</i> qF          | qPCR                                 | GCGAAGGTGATGCTACTTACG                                   | 1.93 (60°C)                                                         |
| CG36 <i>eGFP</i> qR          | qPCR                                 | CACGTATCCTTCTGGCATTG                                    |                                                                     |
| CG31 <i>prfAF</i>            | qPCR                                 | TTGATACAGAAACATCGGTTGG                                  | 1.88 (55°C)                                                         |
| CG32 <i>prfAR</i>            | qPCR                                 | AGCCAAGCTTCCCGTTAATC                                    |                                                                     |
| GC33 <i>hlyF</i>             | qPCR                                 | ATCTCAAGTGTGGCGTATGG                                    | 1.90 (55°C)                                                         |
| CG34 <i>hlyR</i>             | qPCR                                 | ACTTCATCTTTTGCGGAACC                                    |                                                                     |

<sup>1</sup> Amplification efficiency of RT-qPCR primer pairs at the specified T<sub>m</sub>
